# Supplementary material for: AGPAT9 suppresses cell growth, invasion and metastasis by counteracting acidic tumor microenvironment through KLF4/LASS2/V-ATPase signaling pathway in breast cancer
Source: PubMed Central journal article supplement (PMC4621899; doi:10.18632/oncotarget.4074), 2015-06-17
Supplement: oncotarget-06-18406-s001.pdf [file oncotarget-06-18406-s001.pdf]

## SUPPLEMENTARY TABLES, FIGURES AND MOVIES

**Supplementary Table S1: The plasmids used for the construction and transfection**

| Plasmids          | Description            | Origin                      |
|-------------------|------------------------|-----------------------------|
| pGLV3/H1/GFP/Puro | Plasmid construction   | Genepharma, Shanghai, China |
| LV5/GFP/Puro      | Plasmid construction   | Genepharma, Shanghai, China |
| LV6/Puro          | Plasmid construction   | Genepharma, Shanghai, China |
| PG-P1-VSVG        | Lenti-virus production | Genepharma, Shanghai, China |
| PG-P2-REV         | Lenti-virus production | Genepharma, Shanghai, China |
| PG-P3-RRE         | Lenti-virus production | Genepharma, Shanghai, China |
| pLVTHM            | Plasmid construction   | Addgene, Cambridge, MA      |
| pWPXL             | Plasmid construction   | Addgene, Cambridge, MA      |
| psPAX2            | Lenti-virus production | Addgene, Cambridge, MA      |
| pMD2.G            | Lenti-virus production | Addgene, Cambridge, MA      |

**Supplementary Table S2: The sequences of the oligonucleotides for plasmids construct**

| Name                | Sequence                                   |
|---------------------|--------------------------------------------|
| Lenti-shRNA-vector  | L: 5'-GATCCGTTCTCCGAACGTGTCACGTTTCAAGAGAA  |
| (for AGPAT9)        | CGTGACACGTTCCGAGAAGCTTTTTTG-3'             |
|                     | R: 5'-AATTCAAAAAAGTTCTCCGAACGTGTCACGTTCT   |
|                     | CTTGAAACGTGACACGTTCCGAGAACG-3'             |
| Lenti-shRNA1-AGPAT9 | L: 5'-GATCCGGAACTCTGATCCAGTATATTTCAAGAGA   |
|                     | ATATACTGGATCAGAGTTCCCTTTTTTG-3'            |
|                     | R: 5'-AATTCAAAAAAGGGAAGTCTGATCCAGTATATTTCT |
|                     | CTTGAAATATACTGGATCAGAGTTCCCG-3'            |
| Lenti-shRNA2-AGPAT9 | L: 5'-GATCCGGAAAGTGGCCACAGATAATGTTCAAGAG   |
|                     | ACATTATCTGTGGCCACTTTCCTTTTTTG-3'           |
|                     | R: 5'-AATTCAAAAAAGGAAAGTGGCCACAGATAATGTC   |
|                     | TCTTGAACATTATCTGTGGCCACTTTCG-3'            |
| Lenti-shRNA3-AGPAT9 | L: 5'-GATCCGGACCTGCCTAATTACCTTCATTCAAGAGA  |
|                     | TGAAGGTAATTAGGCAGGTCCTTTTTTG-3'            |
|                     | R: 5'-AATTCAAAAAAGGACCTGCCTAATTACCTTCATCT  |
|                     | CTTGAATGAAGGTAATTAGGCAGGTCG-3'             |

(continued)

| Name                                         | Sequence                                                                          |
|----------------------------------------------|-----------------------------------------------------------------------------------|
| Lenti-shRNA4-AGPAT9                          | L: 5'-GATCCGGAGGAGAGAAGATAGGTATTTCAAGAGA<br>ATACCTATCTTCTCTCCTCCTTTTTTG-3'        |
|                                              | R: 5'-AATTCAAAAAAGGAGGAGAGAAGATAGGTATTCT<br>CTTGAAATACCTATCTTCTCTCCTCCG-3'        |
| Lenti-LASS2                                  | L: 5'- TATACGCGTATGCTCCAGACCTTGTA-3'                                              |
|                                              | R: 5'-GCTACTAGTTCAGTCATTCTTACGATGGT-3'                                            |
| Lenti-shRNA-vector<br>(for LASS2 or ATP6V0C) | L: 5'- CGCGTCCCCTTCTCCGAACGTGTCACGTTTCAAG<br>AGAACGTGACACGTTCCGAGAATTTTTGGAAAT-3' |
|                                              | R: 5'-CGATTTCCAAAAATTCTCCGAACGTGTCACGTT<br>CTCTTGAAACGTGACACGTTCCGAGAAGGGGA-3'    |
| Lenti-shRNA1-LASS2                           | L: 5'-CGCGTCCCCGGCCCAGTCTCCTCAAGAATTCAAG<br>AGATTCTTGAGGAGACTGGGCCTTTTTGGAAAT-3'  |
|                                              | R: 5'-CGATTTCCAAAAAGGCCAGTCTCCTCAAGAA<br>TCTCTTGAATTCTTGAGGAGACTGGGCCGGGGA-3'     |
| Lenti-shRNA2-LASS2                           | L: 5'-CGCGTCCCCAGTATTGGTACTACATGATTTCAA<br>GAGAATCATGTAGTACCAATACTTTTTGGAAAT-3'   |
|                                              | R: 5'-CGATTTCCAAAAAGTATTGGTACTACATGATT<br>CTCTTGAAATCATGTAGTACCAATACTGGGGA-3'     |
| Lenti-shRNA1-ATP6V0C                         | L: 5'-CGCGTCCCCTCGGCCTCTACGGTCTCATTCAAGA<br>GAATGAGACCGTAGAGGCCGATTTTTGGAAAT-3'   |
|                                              | R: 5'-CGATTTCCAAAAATCGGCCTCTACGGTCTCATTC<br>TCTTGAAATGAGACCGTAGAGGCCGAGGGGA-3'    |
| Lenti-shRNA2-ATP6V0C                         | L: 5'- CGCGTCCCCGTCCATCATCCCAGTGGTCTTCAAG<br>AGAGACCACTGGGATGATGGACTTTTTGGAAAT-3' |
|                                              | R: 5'- CGATTTCCAAAAAGTCCATCATCCCAGTGGTC<br>TCTCTTGAAGACCACTGGGATGATGGACGGGGA-3'   |

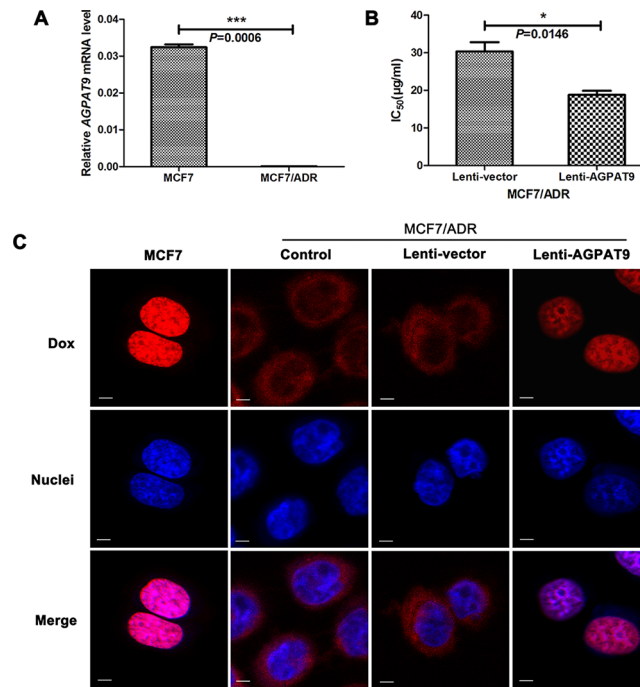

**Supplementary Figure S1: Correlation analysis of *AGPAT9* expression and chemosensitivity.** **A.** The relative mRNA levels of *AGPAT9* in drug-sensitive MCF7 and drug-resistant MCF7/ADR cells. **B.** The overexpression of *AGPAT9* in MCF7/ADR cells obviously decreased the IC<sub>50</sub> value for Dox. **C.** The cells were visualized by confocal microscopy after sequentially loaded with Dox and Hoechst 33342. Red fluorescence indicates Dox; blue fluorescence indicates nuclei. Scale bars: 5 µm (C).

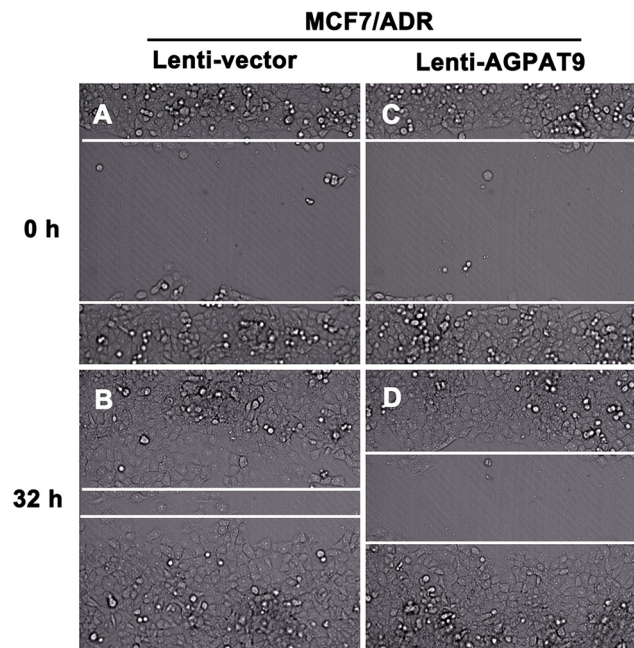

**Supplementary Figure S2: Overexpression of *AGPAT9* inhibited the migration of MCF7/ADR cells.** The migration of cells into the wound was monitored in multiple wells using a CellVoyager CV1000 confocal scanner system. The images were acquired every hour for 32 hours (see Supplementary Movies S5 and S6). The images shown represent 0 hour **A**, **C**, and 32 hours **B**, **D**. The distance between the two edges of the scratch in the Lenti-*AGPAT9* well (**D**) was greater than that of the control (**B**).

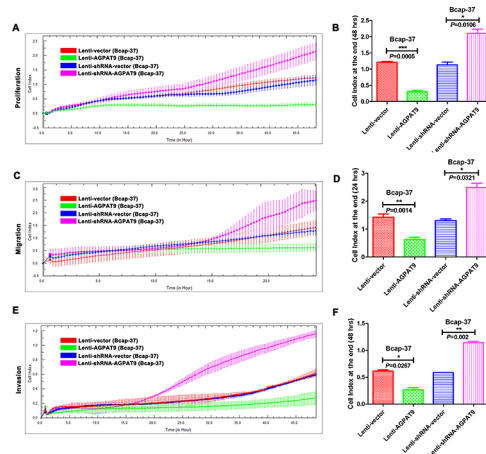

**Supplementary Figure S3: Effect of overexpression or knockdown of *AGPAT9* on the proliferation, migration and invasion abilities of Bcap-37 cells.** Proliferation was monitored for 48 h in the xCELLigence DP system **A**. The cell index was measured every 30 minutes. The rate of change of cell index as a function of time was calculated as a measure of proliferation activity. **B**. The cell index at the end (48 hrs) is shown as a bar chart. Migration **C**, or invasion **E**, was monitored for 24 h or 48 h in the xCELLigence DP system. The cell index was measured every 15 minutes. The rate of change of cell index as a function of time was calculated as a measure of migration or invasion activity. The cell index at the end (24 hrs or 48 hrs) is shown as a bar chart **D, F**.

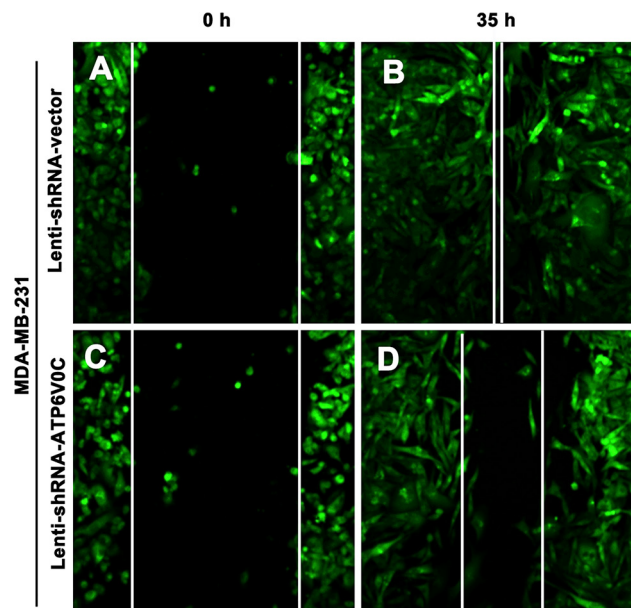

**Supplementary Figure S4: Knockdown of *ATP6V0C* inhibited the migration of MDA-MB-231 cells.** The migration of cells into the wound was monitored in multiple wells using a CellVoyager CV1000 confocal scanner system. The images were acquired every 0.5 hour for 35 hours (see Supplementary Movies S7 and S8). The images shown represent 0 hour **A, C**, and 35 hours **B, D**. The distance between the two edges of the scratch in the Lenti-shRNA-ATP6V0C well (**D**) was greater than that of the control (**B**).

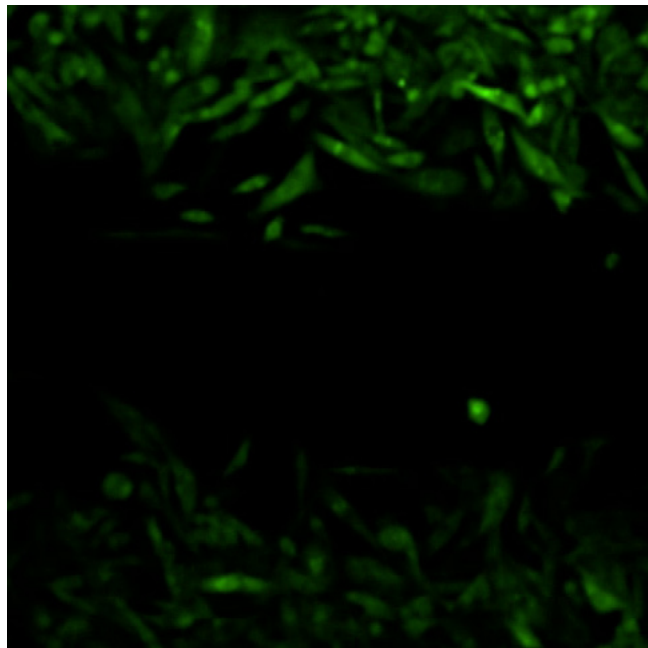

**Supplementary Movie S1: The migration of Lenti-vector (MDA-MB-231) cells into the wound was monitored using a CellVoyager CV1000 confocal scanner system. The images were acquired every 0.5 hour for 28 hours.**

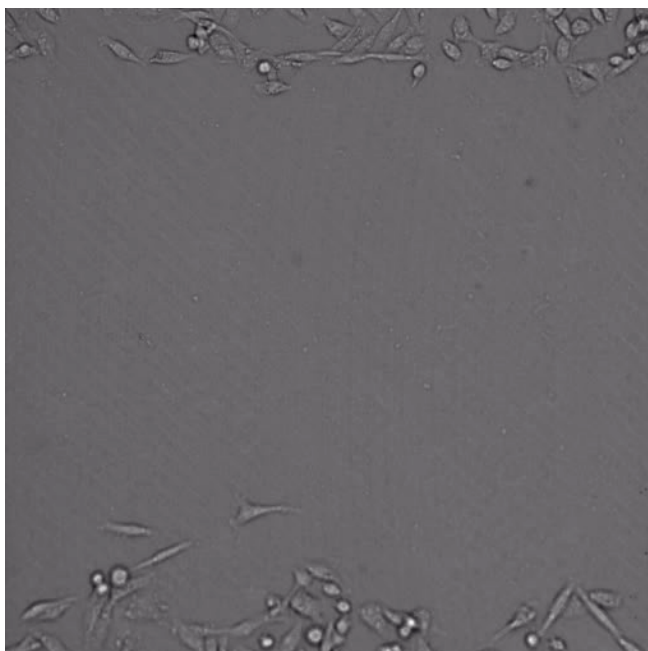

**Supplementary Movie S2: The migration of Lenti-AGPAT9 (MDA-MB-231) cells into the wound was monitored using a CellVoyager CV1000 confocal scanner system. The images were acquired every 0.5 hour for 28 hours.**

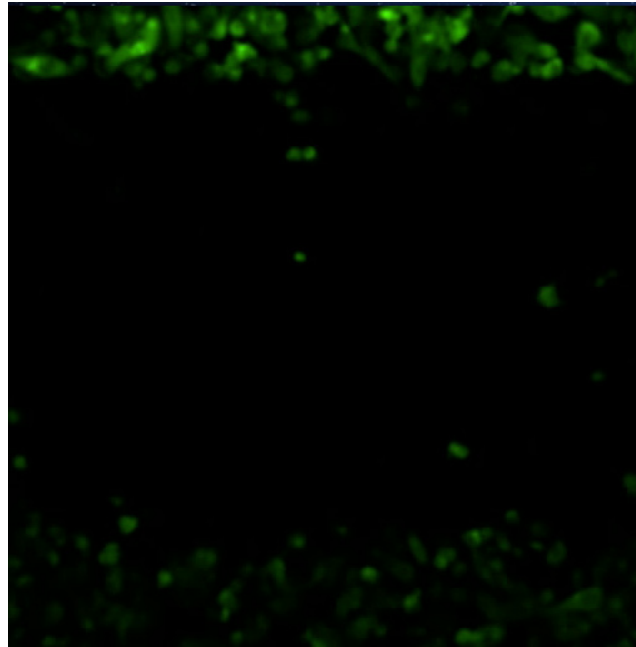

**Supplementary Movie S3: The migration of Lenti-vector-GFP (MDA-MB-231) cells into the wound was monitored using a CellVoyager CV1000 confocal scanner system.** The images were acquired every 0.5 hour for 35 hours.

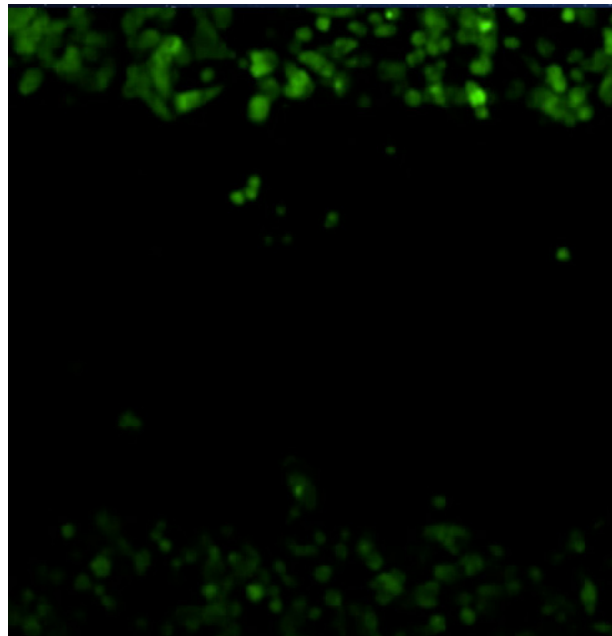

**Supplementary Movie S4: The migration of Lenti-AGPAT9-GFP (MDA-MB-231) cells into the wound was monitored using a CellVoyager CV1000 confocal scanner system.** The images were acquired every 0.5 hour for 35 hours.

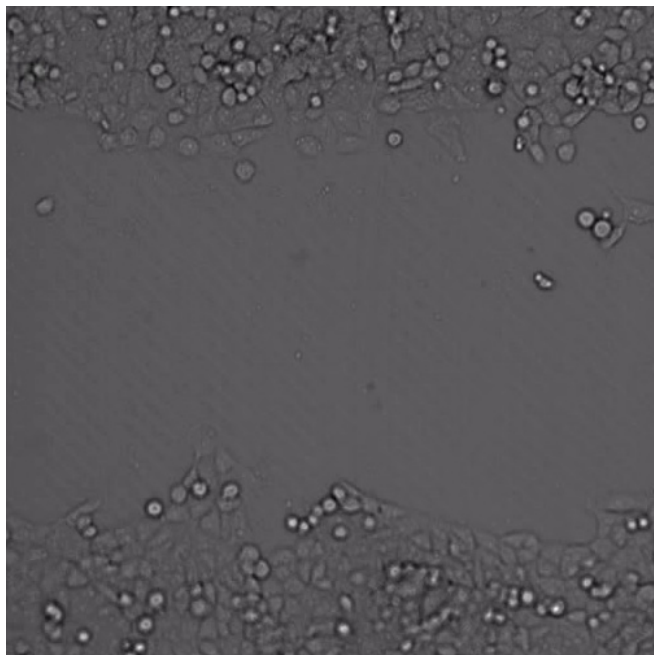

**Supplementary Movie S5: The migration of Lenti-vector (MCF7/ADR) cells into the wound was monitored using a CellVoyager CV1000 confocal scanner system. The images were acquired every hour for 32 hours.**

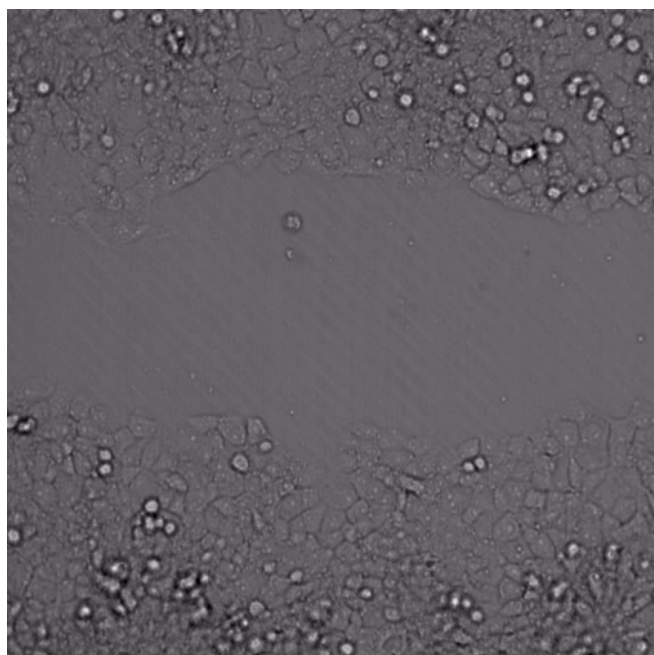

**Supplementary Movie S6: The migration of Lenti-AGPAT9 (MCF7/ADR) cells into the wound was monitored using a CellVoyager CV1000 confocal scanner system. The images were acquired every hour for 32 hours.**

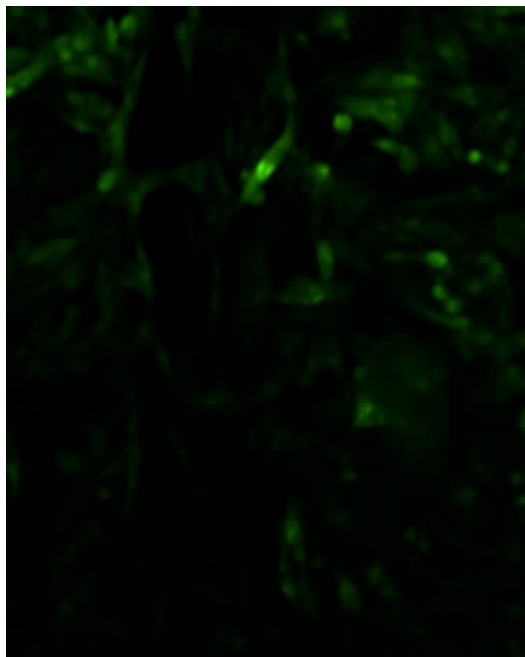

**Supplementary Movie S7: The migration of Lenti-shRNA-vector (MDA-MB-231) cells into the wound was monitored using a CellVoyager CV1000 confocal scanner system. The images were acquired every 0.5 hour for 35 hours.**

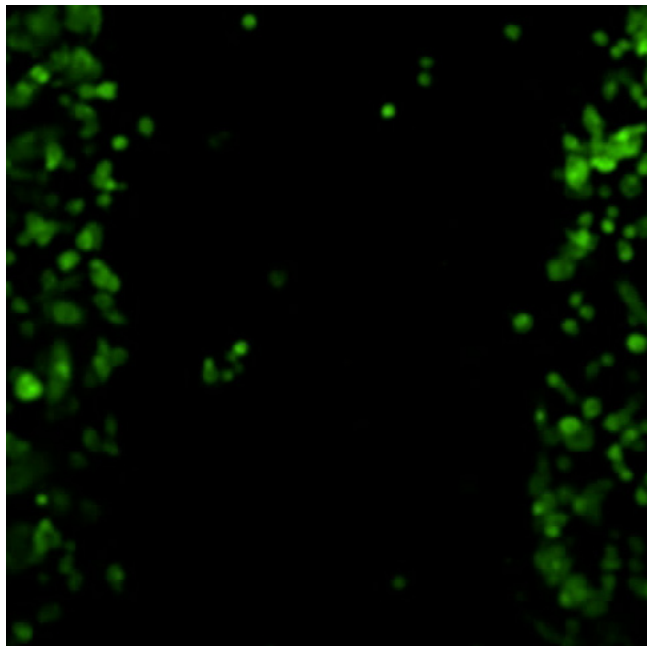

**Supplementary Movie S8: The migration of Lenti-shRNA-ATP6V0C (MDA-MB-231) cells into the wound was monitored using a CellVoyager CV1000 confocal scanner system. The images were acquired every 0.5 hour for 35 hours.**
